# Supplementary material for: Effects of neck-exercise and health promotion on headache outcomes in office workers: secondary analysis of the NEXpro stepped wedge cluster randomised controlled trial
Source: Springer Nature journal article supplement (doi:10.1186/s10194-025-01963-y), 2025-02-12
Supplement: MOESM1 [file 10194_2025_1963_MOESM1_ESM.pdf]

Neck and shoulder exercises used in the NEXpro stepped wedge randomised controlled trial.

| Region                   | Aim                                                                                                                                                                                                                                                                                                                                                                                 |                                                                                                                                                                                                                                                                                                              |
|--------------------------|-------------------------------------------------------------------------------------------------------------------------------------------------------------------------------------------------------------------------------------------------------------------------------------------------------------------------------------------------------------------------------------|--------------------------------------------------------------------------------------------------------------------------------------------------------------------------------------------------------------------------------------------------------------------------------------------------------------|
|                          | Strengthening                                                                                                                                                                                                                                                                                                                                                                       | Stretching and relaxation                                                                                                                                                                                                                                                                                    |
| Neck region              | 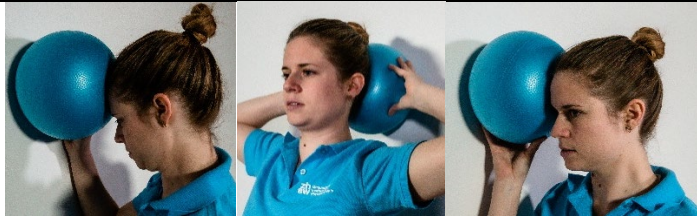 <p>For Flexion, Extension and Rotation direction, either isometric contractions, or contractions within a small range of motions were used. Alternative to a soft ball, tera-bands could be used, or even pushing in one's own hand.<br/><b>Repetitions:</b> approximately 5 x for 5 seconds</p> |  <p>Self-massage and stretching the upper trapezius and upper cervical extensors were instructed.<br/><b>Repetitions:</b> approximately 3 times for 20 seconds. Other balls, like a tennis ball could have been used.</p> |
| Shoulder (girdle) region |  <p>Frontal and backwards pushes at their own desk, shoulder-girdle shrugs and arm raises with a tera band and an extra push for shoulder girdle elevation had been instructed.<br/><b>Repetitions:</b> approximately 3 times 10 repetitions.</p>                                                 |  <p>Upper body rotations, side bendings and shoulder-girdle circling had been instructed, preferably in standing position.<br/><b>Repetitions:</b> approximately 3 times for 20 seconds.</p>                              |

Individual adaptations could have been applied, if needed and indicated.
